# Supplementary material
Source: PubMed Central journal article supplement (PMC4718771)
Supplement: NIHMS728956-supplement-Supplemental.pdf [file NIHMS728956-supplement-Supplemental.pdf]

Supplemental Table 1. Overview of Comprehensive Self-Management Sessions

| Diet | Relaxation | Alternative Thoughts | CSM Session Details                                                                                                                                                                                                                                                                    | Homework                                                                                                                                                         |
|------|------------|----------------------|----------------------------------------------------------------------------------------------------------------------------------------------------------------------------------------------------------------------------------------------------------------------------------------|------------------------------------------------------------------------------------------------------------------------------------------------------------------|
|      | X          | X                    | <b>1. Overview of IBS</b> <ul style="list-style-type: none"> <li>Relaxation skills: abdominal breathing, quieting response</li> </ul>                                                                                                                                                  | <ul style="list-style-type: none"> <li>Abdominal breathing</li> <li>Quieting response</li> </ul>                                                                 |
| X    |            |                      | <b>2. Diet</b> <ul style="list-style-type: none"> <li>Diet composition: vitamins</li> <li>Meal size and frequency</li> <li>Eating behaviors</li> <li>Food triggers</li> </ul>                                                                                                          | <ul style="list-style-type: none"> <li>Abdominal breathing</li> <li>Quieting response</li> <li>Eat frequently</li> <li>Food journaling</li> </ul>                |
| X    |            |                      | <b>3. Trigger Foods &amp; Healthy Thought Patterns</b> <ul style="list-style-type: none"> <li>Identifying personalized food triggers</li> <li>Cognitive restructuring: identify automatic thoughts, change to healthier thought</li> </ul>                                             | <ul style="list-style-type: none"> <li>Quieting response</li> <li>Trigger food listing</li> <li>Write problematic thoughts and healthier thinking</li> </ul>     |
|      | X          | X                    | <b>4. Relaxation Skills &amp; Problem Solving</b> <ul style="list-style-type: none"> <li>Progressive muscle relaxation (PMR)</li> <li>Body scan</li> <li>6-step problem-solving process</li> <li>Find support when needed</li> </ul>                                                   | <ul style="list-style-type: none"> <li>Quieting response</li> <li>Active PMR</li> <li>6-step problem-solving worksheet</li> </ul>                                |
| X    |            | X                    | <b>5. Fiber &amp; Identification of False Beliefs</b> <ul style="list-style-type: none"> <li>Diet composition: fluids, fiber tolerance</li> <li>Challenging false beliefs: perfectionism, need for control, lack of assertiveness, poor self-esteem</li> </ul>                         | <ul style="list-style-type: none"> <li>Active PMR</li> <li>Plan for fiber</li> <li>Self-examples of problematic thinking</li> </ul>                              |
| X    | X          | X                    | <b>6. Sleep &amp; Autogenic Exercises</b> <ul style="list-style-type: none"> <li>Good sleeping habits</li> <li>Autogenic relaxation exercises</li> </ul>                                                                                                                               | <ul style="list-style-type: none"> <li>Quieting response</li> <li>Autogenic tape</li> <li>Good sleep habits</li> </ul>                                           |
| X    | X          | X                    | <b>7. Pain Control &amp; Sex</b> <ul style="list-style-type: none"> <li>Cognitive restructuring: change your focus &amp; distraction</li> <li>Visualization exercises</li> <li>Sex and IBS</li> </ul>                                                                                  | <ul style="list-style-type: none"> <li>Quieting response</li> <li>Identify two diet changes and problematic thoughts</li> <li>Visualization exercises</li> </ul> |
| X    | X          | X                    | <b>8. Eating Out &amp; Traveling</b> <ul style="list-style-type: none"> <li>Eating out and travel tips</li> <li>Mini-Relaxation Exercises                             <ul style="list-style-type: none"> <li>Abbreviated active PMR</li> <li>Wave of relaxation</li> </ul> </li> </ul> | <ul style="list-style-type: none"> <li>Comprehensive plan</li> </ul>                                                                                             |
| X    | X          | X                    | <b>9. A Plan For the Future</b> <ul style="list-style-type: none"> <li>Evaluation of comprehensive plan</li> </ul>                                                                                                                                                                     | <ul style="list-style-type: none"> <li>Action Plan</li> </ul>                                                                                                    |

Supplemental Table 2. Detailed Responses of Relevant CSM Strategies

| <b>Trigger foods</b>             | <b>Supplements and vitamins</b> | <b>Exercise</b> | <b>Time for Self</b> |
|----------------------------------|---------------------------------|-----------------|----------------------|
| N = 75                           | N = 32                          | N = 58          | N = 52               |
| Fatty foods (52%)                | Multivitamin (44%)              | Walking (60%)   | Breaks (29%)         |
| Specific fruits/vegetables (41%) | Fiber (38%)                     | Gym (33%)       | Reading (25%)        |
| Caffeine (37%)                   | Calcium (28%)                   | Swimming (19%)  | Time for Self (25%)  |
| Dairy (28%)                      | Herbal Tea (9%)                 | Aerobics (10%)  | Music (17%)          |
| Spicy foods (12%)                | Lactaid (6%)                    | Biking (10%)    | Journaling (10%)     |
| Carbonated beverages (12%)       | Beano (6%)                      | Running (9%)    | Hobbies (10%)        |
| Alcohol (12%)                    | Vitamin D (3%)                  | Golfing (3%)    |                      |
| Sweets (11%)                     | Probiotics (3%)                 |                 |                      |
| Beans (11%)                      | Vitamin B6 (3%)                 |                 |                      |
| Chocolate (9%)                   |                                 |                 |                      |
| Acidic foods (9%)                |                                 |                 |                      |
| Meat (9%)                        |                                 |                 |                      |
| Popcorn/nuts (7%)                |                                 |                 |                      |
| Wheat/breads/pasta (4%)          |                                 |                 |                      |
| Processed foods (3%)             |                                 |                 |                      |
| Eggs (3%)                        |                                 |                 |                      |
